# Supplementary material for: Perceiving Beyond the Seizures: “A Study on Epilepsy Stigma in the General Population of Karachi”
Source: Research Square preprint supplement (doi:10.21203/rs.3.rs-7171592/v1), 2025-09-04
Supplement: Supplementary file 1 [file 0589f56358689b37c6401254.docx]

**Performa (Structured Questionnaire-English Version)**

**Section A: Socio-Demographic Information**

1. Age: ______ years
2. Sex: □ Male □ Female □ Other
3. Marital Status: □ Single □ Married □ Divorced □ Widowed
4. Education Level: □ No formal education □ Primary □ Secondary □ Higher Secondary □ Graduate or above
5. Employment Status: □ Employed □ Unemployed □ Student □ Retired □ Other ____________
6. Monthly Household Income: □ < PKR 10,000 □ 10,001–30,000 □ 30,001–50,000 □ >50,000
7. Family Type: □ Nuclear □ Joint □ Extended
8. Number of siblings: _____
9. Birth order: _____

**Section B: Clinical Characteristics**

1. Age at epilepsy diagnosis: _____ years
2. Duration of epilepsy: _____ years
3. Frequency of seizures in past 6 months: _____
4. Type of seizures: □ Focal □ Generalized □ Unknown
5. Anti-epileptic medications currently used: ______________________________________
6. Medication adherence: □ Regular □ Irregular □ non-adherent
7. Comorbid mental health conditions (if any): □ Depression □ Anxiety □ Other: ______
8. History of self-harm in past 6 months: □ Yes □ No
9. Hospitalizations in past 6 months due to seizures: □ Yes □ No
10. Seizure-related injuries in past 6 months: □ Yes □ No

Section C: Standardized Scales (tick and score items will be included as per scale manuals)

**Epilepsy Stigma Scale (ESS):**

Each item is typically rated on a **Likert scale** (e.g., 1 = Strongly Disagree to 5 = Strongly Agree).

1. People with epilepsy are treated as inferior.
2. I feel embarrassed because of my epilepsy.
3. I feel people avoid me because I have epilepsy.
4. People with epilepsy are not as capable as others.
5. Having epilepsy makes me feel like an outsider.
6. I avoid telling others about my epilepsy.
7. I have been treated unfairly because of my epilepsy.
8. People think epilepsy is a mental illness.
9. People with epilepsy are looked down upon.
10. I think others see me as less competent because I have epilepsy.

**Liverpool Seizure Severity Scale:**

Each items are rated on a **4-point Likert scale** (e.g., 0 = not at all to 3 = a lot/extremely).

1. Did you bite your tongue during the seizure?
2. Did you lose bladder control (urinate)?
3. Did you lose bowel control?
4. Were you injured during the seizure?
5. Did you fall during the seizure?
6. Did you experience confusion after the seizure?
7. Were you disoriented after the seizure?
8. Were you embarrassed by the seizure?
9. Did the seizure affect your self-confidence?
10. Did the seizure affect your mood or emotions?
11. Were you worried about having another seizure?
12. Did you avoid going out or doing activities because of the seizure?
13. Did you feel tired or exhausted after the seizure?
14. Did you experience memory loss related to the seizure?
15. Did you have difficulty concentrating afterward?
16. Did the seizure interfere with your work or studies?
17. Did the seizure interfere with social activities?
18. Did the seizure affect your sleep?
19. Did you need someone else's help during or after the seizure?
20. Did you take any extra medication because of the seizure?

**Charlson Comorbidity Index:**

| **Comorbidity** | **Weight** |
| --- | --- |
| Myocardial infarction | 1 |
| Congestive heart failure | 1 |
| Peripheral vascular disease | 1 |
| Cerebrovascular disease (stroke, TIA) | 1 |
| Dementia | 1 |
| Chronic pulmonary disease (e.g., COPD) | 1 |
| Connective tissue disease (e.g., SLE, RA) | 1 |
| Peptic ulcer disease | 1 |
| Mild liver disease | 1 |
| Diabetes without end-organ damage | 1 |
| Diabetes with end-organ damage | 2 |
| Hemiplegia or paraplegia | 2 |
| Moderate or severe renal disease | 2 |
| Any malignancy (including lymphoma, leukemia) | 2 |
| Moderate or severe liver disease | 3 |
| Metastatic solid tumor | 6 |
| AIDS (Acquired Immunodeficiency Syndrome) | 6 |

**Epilepsy Self-Efficacy Scale (ESES):**

Each item is rated on a **10-point Likert scale**, where: **1 = Not at all confident** and **10 = Totally confident**

- 1. Take your seizure medications on time.
  2. Keep track of when you take your seizure medications.
  3. Explain your condition to others.
  4. Deal with feelings of anxiety related to seizures.
  5. Stay calm when you feel a seizure might be coming.
  6. Recognize signs that a seizure may occur.
  7. Avoid seizure triggers.
  8. Handle a seizure if it happens in public.
  9. Ask for help when you need it.
  10. Manage stress in your daily life.
  11. Eat regular meals and stay hydrated.
  12. Get enough sleep to reduce seizure risk.
  13. Monitor your medication side effects.
  14. Talk with your doctor about seizure problems.
  15. Adjust your activities to stay safe.
  16. Follow safety precautions to prevent injury during a seizure.
  17. Cope with memory problems related to seizures.
  18. Talk about epilepsy without feeling embarrassed.
  19. Make decisions about driving or activities that may be risky.
  20. Stay positive even when seizures occur.
  21. Deal with the effects of seizures on work or school.
  22. Exercise regularly while staying safe.
  23. Use coping strategies during stressful situations.
  24. Manage your social life and relationships.
  25. Get information about epilepsy when needed.
  26. Keep a seizure diary or record.
  27. Plan for what to do if a seizure occurs at night.
  28. Handle changes in seizure pattern.
  29. Prepare for your medical appointments.
  30. Follow up with lab tests or doctor’s instructions.
  31. Use reminders or tools to manage your condition.
  32. Talk to others with epilepsy about their experience.
  33. Deal with people who do not understand epilepsy.

**Epilepsy Self-Management Scale (ESMS)**

Each item is rated on a **5-point Likert scale**:
**1 = Never, 2 = Rarely, 3 = Sometimes, 4 = Most of the time, 5 = Always**

**A. Medication Management**

1. I take my seizure medicine exactly as prescribed.
2. I make sure not to skip doses of my seizure medicine.
3. I keep a schedule of my seizure medicine.
4. I refill my prescriptions before they run out.
5. I talk to my doctor about any side effects I experience.

**B. Information Management**

1. I ask my doctor questions about my seizures.
2. I read or look for information about epilepsy.
3. I discuss my epilepsy with others to help them understand.
4. I record my seizure activity in a journal or app.
5. I keep track of seizure triggers.

**C. Safety Management**

1. I avoid activities that could be dangerous during a seizure.
2. I make sure someone knows what to do if I have a seizure.
3. I take precautions when bathing or swimming.
4. I avoid climbing ladders or working at heights alone.
5. I check with my doctor before using over-the-counter drugs.

**D. Seizure Management**

1. I recognize warning signs that a seizure may be coming.
2. I have a plan for what to do when a seizure starts.
3. I stay calm when a seizure happens.
4. I recover safely after a seizure.
5. I have emergency contacts available.

**E. Lifestyle Management**

1. I get enough sleep.
2. I limit alcohol or avoid it completely.
3. I manage stress through relaxation techniques.
4. I eat regular and healthy meals.
5. I follow an exercise routine suitable for epilepsy.
6. I avoid flashing lights or known seizure triggers.
7. I plan daily activities with my condition in mind.
8. I take steps to manage depression or anxiety.
9. I maintain social relationships.
10. I inform friends/family about how to help during a seizure.
11. I wear medical alert jewelry.
12. I keep my doctor's appointments.
13. I monitor my mood and mental health.
14. I ask for help when needed.
15. I follow up on lab work or test results.
16. I discuss lifestyle changes with my doctor.
17. I plan for medication changes or travel.
18. I avoid sleep deprivation.

**REALM-M (Health Literacy):**

Patients are asked to read aloud the following words:

1. Fat
2. Flu
3. Pill
4. Dose
5. Eye
6. Stress
7. Smear
8. Nerve
9. Meals
10. Disease
11. Constipation

**PHQ-9 (Depression Severity):**

| **No.** | **Item** | **Response Options** |
| --- | --- | --- |
| 1 | Little interest or pleasure in doing things | 0 = Not at all1 = Several days2 = More than half the days3 = Nearly every day |
| 2 | Feeling down, depressed, or hopeless | 0–3 |
| 3 | Trouble falling or staying asleep, or sleeping too much | 0–3 |
| 4 | Feeling tired or having little energy | 0–3 |
| 5 | Poor appetite or overeating | 0–3 |
| 6 | Feeling bad about yourself—or that you are a failure or let your family down | 0–3 |
| 7 | Trouble concentrating on things, such as reading or watching TV | 0–3 |
| 8 | Moving or speaking slowly—or being so fidgety/restless more than usual | 0–3 |
| 9 | Thoughts that you would be better off dead or hurting yourself | 0–3 |

**MADRS (Depression Severity):**

Each item is scored from **0 to 6**, with:**0 = no symptoms** and **6 = severe symptoms**

1. **Apparent sadness**
   Observable despondency, gloom, poor eye contact, slowed speech.
   *0 = No sadness; 6 = Extreme depression with pervasive misery*
2. **Reported sadness**
   Self-reported low mood or despair.
   *0 = No sadness; 6 = Utterly miserable*
3. **Inner tension**
   Feelings of restlessness, tension, worry, or panic.
   *0 = No tension; 6 = Constant panic and anxiety*
4. **Reduced sleep**
   Difficulty falling/staying asleep or reduced sleep.
   *0 = Sleeps as usual; 6 = Complete sleeplessness*
5. **Reduced appetite**
   Decrease in appetite or weight loss.
   *0 = Normal appetite; 6 = No appetite at all*
6. **Concentration difficulties**
   Difficulty focusing or thinking clearly.
   *0 = No difficulty; 6 = Unable to read or think clearly*
7. **Lassitude**
   Lack of energy, motivation, or drive.
   *0 = Normal activity; 6 = Complete inactivity and exhaustion*
8. **Inability to feel**
   Emotional numbness, reduced affect toward others or activities.
   *0 = Able to feel; 6 = Completely emotionally blunted*
9. **Pessimistic thoughts**
   Hopelessness, negative expectations about self, future, or health.
   *0 = Normal; 6 = Extreme pessimism, belief in incurability*
10. **Suicidal thoughts**
    Thoughts of death, self-harm, or suicide.
    *0 = No thoughts; 6 = Explicit plans or attempts*

**SF-36 (Functional Health Status):**

1. In general, would you say your health is:

 1 - Excellent

 2 - Very good

 3 - Good

 4 - Fair

 5 - Poor

2. **Compared to one year ago**, how would you rate your health in general **now**?

 1 - Much better now than one year ago

 2 - Somewhat better now than one year ago

 3 - About the same

 4 - Somewhat worse now than one year ago

 5 - Much worse now than one year ago

The following items are about activities you might do during a typical day. Does **your health now limit you** in these activities? If so, how much?

|  | Yes, limited a lot | Yes, limited a little | No, not limited at all |
| --- | --- | --- | --- |
| 3. **Vigorous activities**, such as running, lifting heavy objects, participating in strenuous sports | 1 | 2 | 3 |
| 4. **Moderate activities**, such as moving a table, pushing a vacuum cleaner, bowling, or playing golf | 1 | 2 | 3 |
| 5. Lifting or carrying groceries | 1 | 2 | 3 |
| 6. Climbing **several** flights of stairs | 1 | 2 | 3 |
| 7. Climbing **one** flight of stairs | 1 | 2 | 3 |
| 8. Bending, kneeling, or stooping | 1 | 2 | 3 |
| 9. Walking **more than a mile** | 1 | 2 | 3 |
| 10. Walking **several blocks** | 1 | 2 | 3 |
| 11. Walking **one block** | 1 | 2 | 3 |
| 12. Bathing or dressing yourself | 1 | 2 | 3 |

During the **past 4 weeks**, have you had any of the following problems with your work or other regular daily activities **as a result of your physical health**?

|  | Yes | No |
| --- | --- | --- |
| 13. Cut down the **amount of time** you spent on work or other activities | 1 | 2 |
| 14. **Accomplished less** than you would like | 1 | 2 |
| 15. Were limited in the **kind** of work or other activities | 1 | 2 |
| 16. Had **difficulty** performing the work or other activities (for example, it took extra effort) | 1 | 2 |

During the **past 4 weeks**, have you had any of the following problems with your work or other regular daily activities **as a result of any emotional problems** (such as feeling depressed or anxious)?

|  | Yes | No |
| --- | --- | --- |
| 17. Cut down the **amount of time** you spent on work or other activities | 1 | 2 |
| 18. **Accomplished less** than you would like | 1 | 2 |
| 19. Didn't do work or other activities as **carefully** as usual | 1 | 2 |

20. During the **past 4 weeks**, to what extent has your physical health or emotional problems interfered with your normal social activities with family, friends, neighbors, or groups?

 1 - Not at all

 2 - Slightly

 3 - Moderately

 4 - Quite a bit

 5 - Extremely

21. How much **bodily** pain have you had during the **past 4 weeks**?

 1 - None

 2 - Very mild

 3 - Mild

 4 - Moderate

 5 - Severe

 6 - Very severe

22. During the **past 4 weeks**, how much did **pain** interfere with your normal work (including both work outside the home and housework)?

 1 - Not at all

 2 - A little bit

 3 - Moderately

 4 - Quite a bit

 5 - Extremely

These questions are about how you feel and how things have been with you **during the past 4 weeks**. For each question, please give the one answer that comes closest to the way you have been feeling.

How much of the time during the **past 4 weeks**...

|  | All of the time | Most of the time | A good bit of the time | Some of the time | A little of the time | None of the time |
| --- | --- | --- | --- | --- | --- | --- |
| 23. Did you feel full of pep? | 1 | 2 | 3 | 4 | 5 | 6 |
| 24. Have you been a very nervous person? | 1 | 2 | 3 | 4 | 5 | 6 |
| 25. Have you felt so down in the dumps that nothing could cheer you up? | 1 | 2 | 3 | 4 | 5 | 6 |
| 26. Have you felt calm and peaceful? | 1 | 2 | 3 | 4 | 5 | 6 |
| 27. Did you have a lot of energy? | 1 | 2 | 3 | 4 | 5 | 6 |
| 28. Have you felt downhearted and blue? | 1 | 2 | 3 | 4 | 5 | 6 |
| 29. Did you feel worn out? | 1 | 2 | 3 | 4 | 5 | 6 |
| 30. Have you been a happy person? | 1 | 2 | 3 | 4 | 5 | 6 |
| 31. Did you feel tired? | 1 | 2 | 3 | 4 | 5 | 6 |

32. During the **past 4 weeks**, how much of the time has **your physical health or emotional problems** interfered with your social activities (like visiting with friends, relatives, etc.)?

 1 - All of the time

 2 - Most of the time

 3 - Some of the time

 4 - A little of the time

 5 - None of the time

How TRUE or FALSE is **each** of the following statements for you.

|  | Definitely true | Mostly true | Don't know | Mostly false | Definitely false |
| --- | --- | --- | --- | --- | --- |
| 33. I seem to get sick a little easier than other people | 1 | 2 | 3 | 4 | 5 |
| 34. I am as healthy as anybody I know | 1 | 2 | 3 | 4 | 5 |
| 35. I expect my health to get worse | 1 | 2 | 3 | 4 | 5 |
| 36. My health is excellent | 1 | 2 | 3 | 4 | 5 |

**QOLIE-10 (Quality of Life):**

Each item is rated on a **5-point Likert scale**, such as:

**1** – All of the time
**2** – Most of the time
**3** – Some of the time
**4** – A little of the time
**5** – None of the time

| **Item** | **Question** | **Domain** |
| --- | --- | --- |
| **1** | How often has epilepsy affected your ability to enjoy life? | Emotional well-being |
| **2** | How often have you had trouble with memory because of epilepsy? | Cognitive functioning |
| **3** | How often have you had trouble with work or school activities? | Social role functioning |
| **4** | How often have you felt discouraged because of your epilepsy? | Mood/depression |
| **5** | How often has epilepsy interfered with your social activities? | Social functioning |
| **6** | How often have you been afraid of having a seizure in public? | Fear/worry |
| **7** | How often have you felt physical limitations due to epilepsy? | Physical health |
| **8** | How often have seizures interfered with your daily activities? | Seizure worry |
| **9** | How much has epilepsy affected your overall quality of life? | Global QoL perception |
| **10** | How often have you worried about when your next seizure might happen? | Seizure worry |

**MSPSS (Social Support):**

Each item is rated on a **7-point Likert scale**:

**1** = Very strongly disagree
**2** = Strongly disagree
**3** = Mildly disagree
**4** = Neutral
**5** = Mildly agree
**6** = Strongly agree
**7** = Very strongly agree

| **Item** | **Statement** | **Subscale** |
| --- | --- | --- |
| 1 | There is a special person who is around when I am in need. | Significant Other |
| 2 | There is a special person with whom I can share joys and sorrows. | Significant Other |
| 3 | My family really tries to help me. | Family |
| 4 | I get the emotional help and support I need from my family. | Family |
| 5 | I have a special person who is a real source of comfort to me. | Significant Other |
| 6 | My friends really try to help me. | Friends |
| 7 | I can count on my friends when things go wrong. | Friends |
| 8 | I can talk about my problems with my family. | Family |
| 9 | I have friends with whom I can share my joys and sorrows. | Friends |
| 10 | There is a special person in my life who cares about my feelings. | Significant Other |
| 11 | My family is willing to help me make decisions. | Family |
| 12 | I can talk about my problems with my friends. | Friends |
